# Supplementary material for: Quantifying selection in high-throughput Immunoglobulin sequencing data sets
Source: PubMed Central journal article supplement — Nucleic Acids Res. 2012 May 25;40(17):e134. doi: 10.1093/nar/gks457 (PMC3458526; doi:10.1093/nar/gks457), 2012-05-25
Supplement: supp_gks457_nar-00215-met-n-2012-File008.pdf [file supp_gks457_nar-00215-met-n-2012-File008.pdf]

Supporting Information for:  
**Quantifying selection in high-throughput  
Immunoglobulin sequencing datasets**

Gur Yaari<sup>1</sup>, Mohamed Uduman<sup>2</sup> and Steven H. Kleinstein<sup>1,2</sup>  
gur.yaari@yale.edu, steven.kleinstein@yale.edu

<sup>1</sup> Department of Pathology, Yale University School of Medicine, New Haven, CT, USA

<sup>2</sup> Interdepartmental Program in Computational Biology and Bioinformatics, Yale University, New Haven, CT, USA

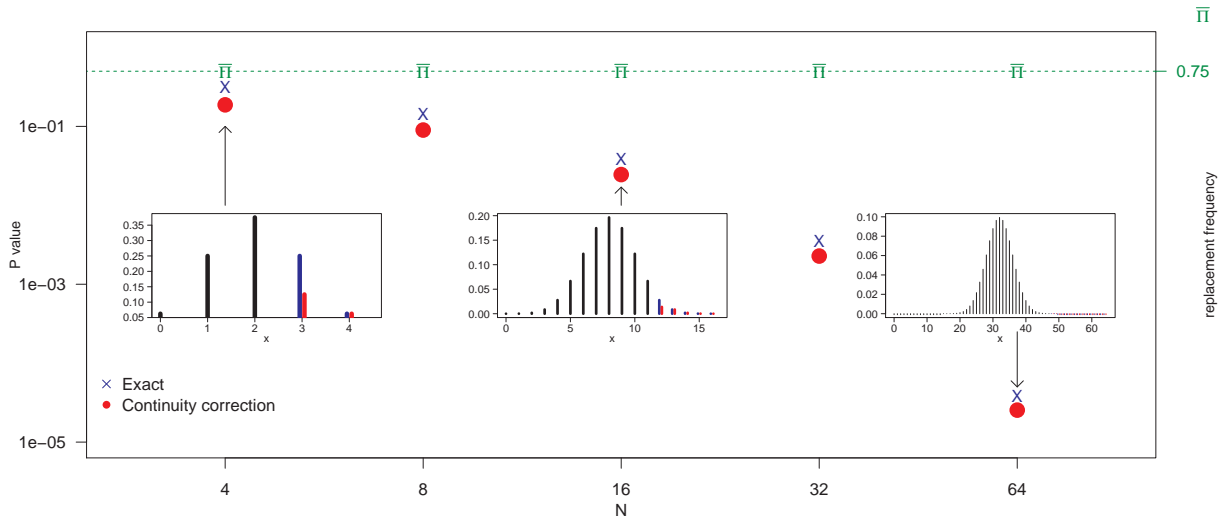

Figure S1: P values are not equivalent to selection strength. Increasing the number of mutations ( $N = 4, 8, 16, 32, 64$ ) leads to decreasing P values from a Binomial test (points), even when the number of replacements ( $x$ ) is set to maintain the same overall frequency ( $\pi = 0.75$ ). P values were calculated either through an “exact” method (blue X’s and bars in the subplots) or applying a continuity correction (red circles and bars in the subplots). In contrast, the maximum likelihood value for the probability of replacement mutations ( $\bar{\pi}$ ) remains the same (green symbols, right axis).

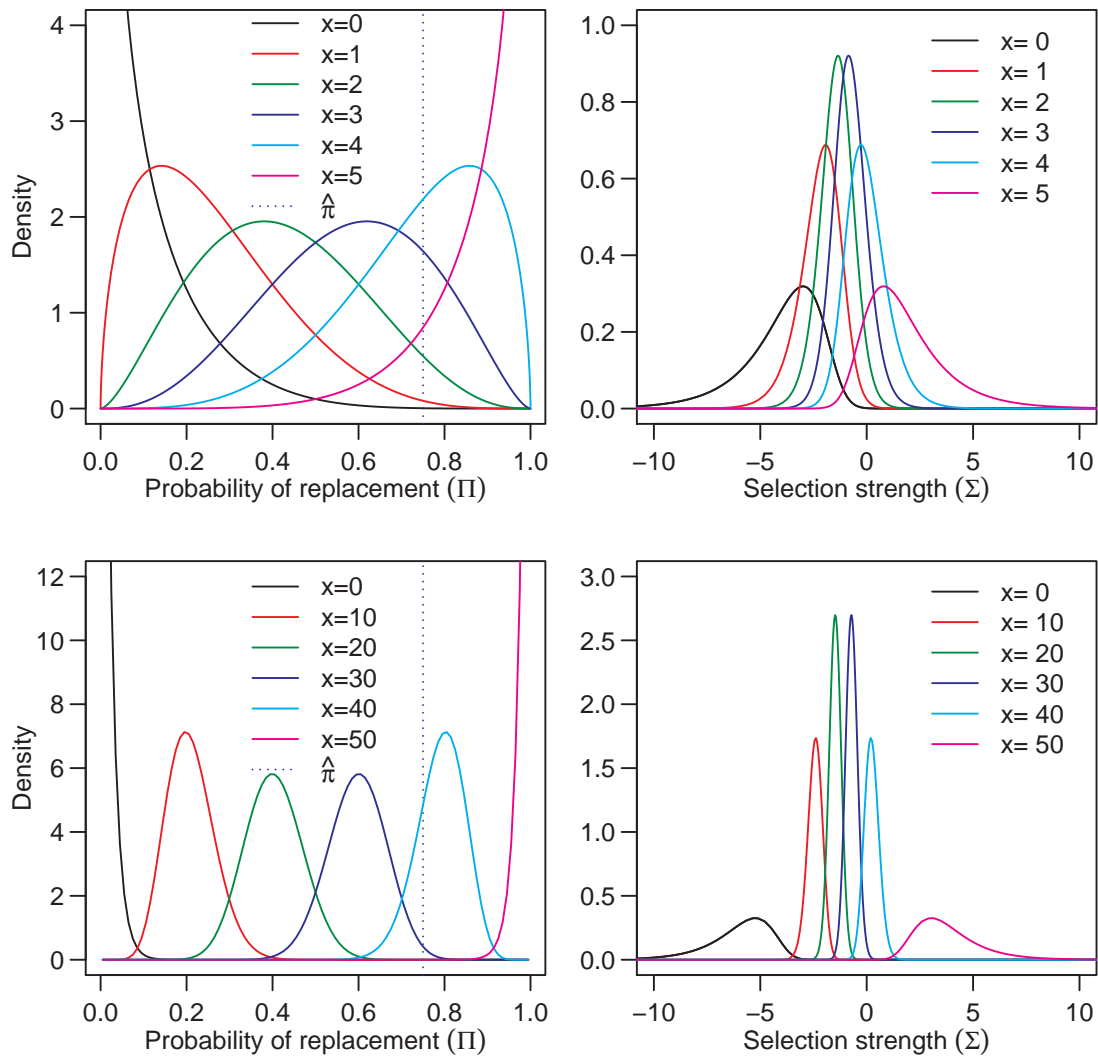

Figure S2: Moving from the frequency of replacement mutations ( $\pi$ ) to selection strength ( $\Sigma$ ). The Bayesian posterior distribution was calculated for different values of  $x$  (individual curves) and  $N$  ( $N = 5$  for upper panels and 50 for lower panels). In all cases, the expected frequency  $\hat{\pi} = 0.75$ .

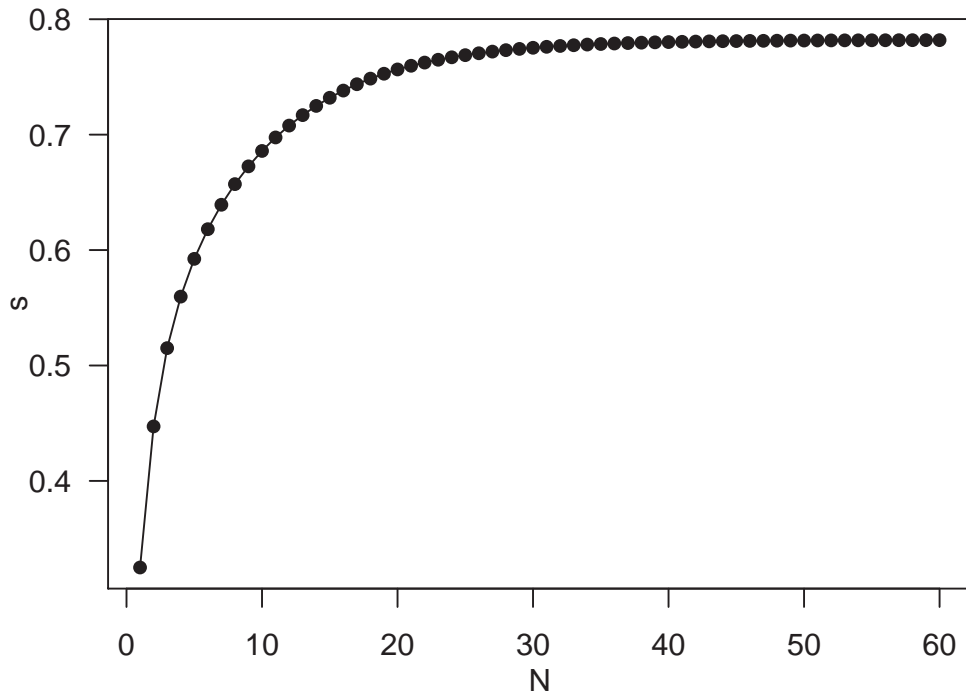

Figure S3: Estimated values of the hyperparameters ( $a = b = s$ ) for the Beta prior. At each value of  $N \in \{1 \dots 60\}$ , fitting was carried out as in Figure 2b.

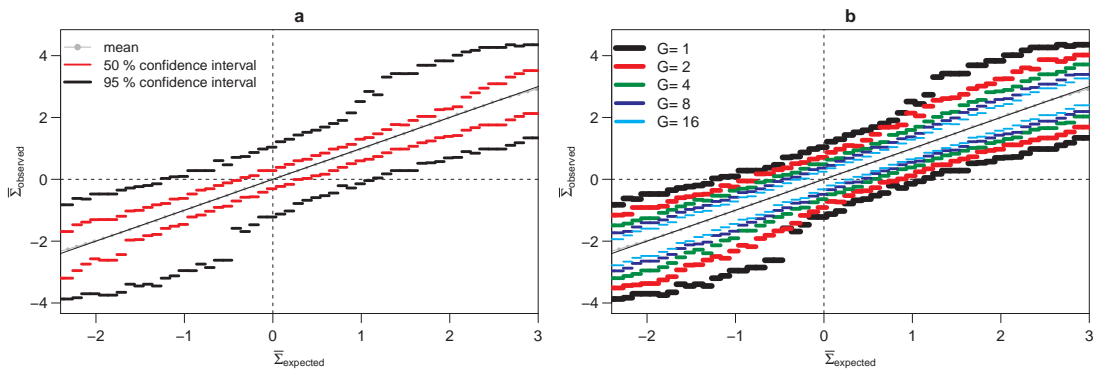

Figure S4: Validation of the Bayesian framework Analogous plot to main figure 2(d,e), but using a binomial-based simulation with an expected replacement frequency ( $\hat{\pi}) = 0.43$ , and the number of mutations drawn randomly between 5 and 25.

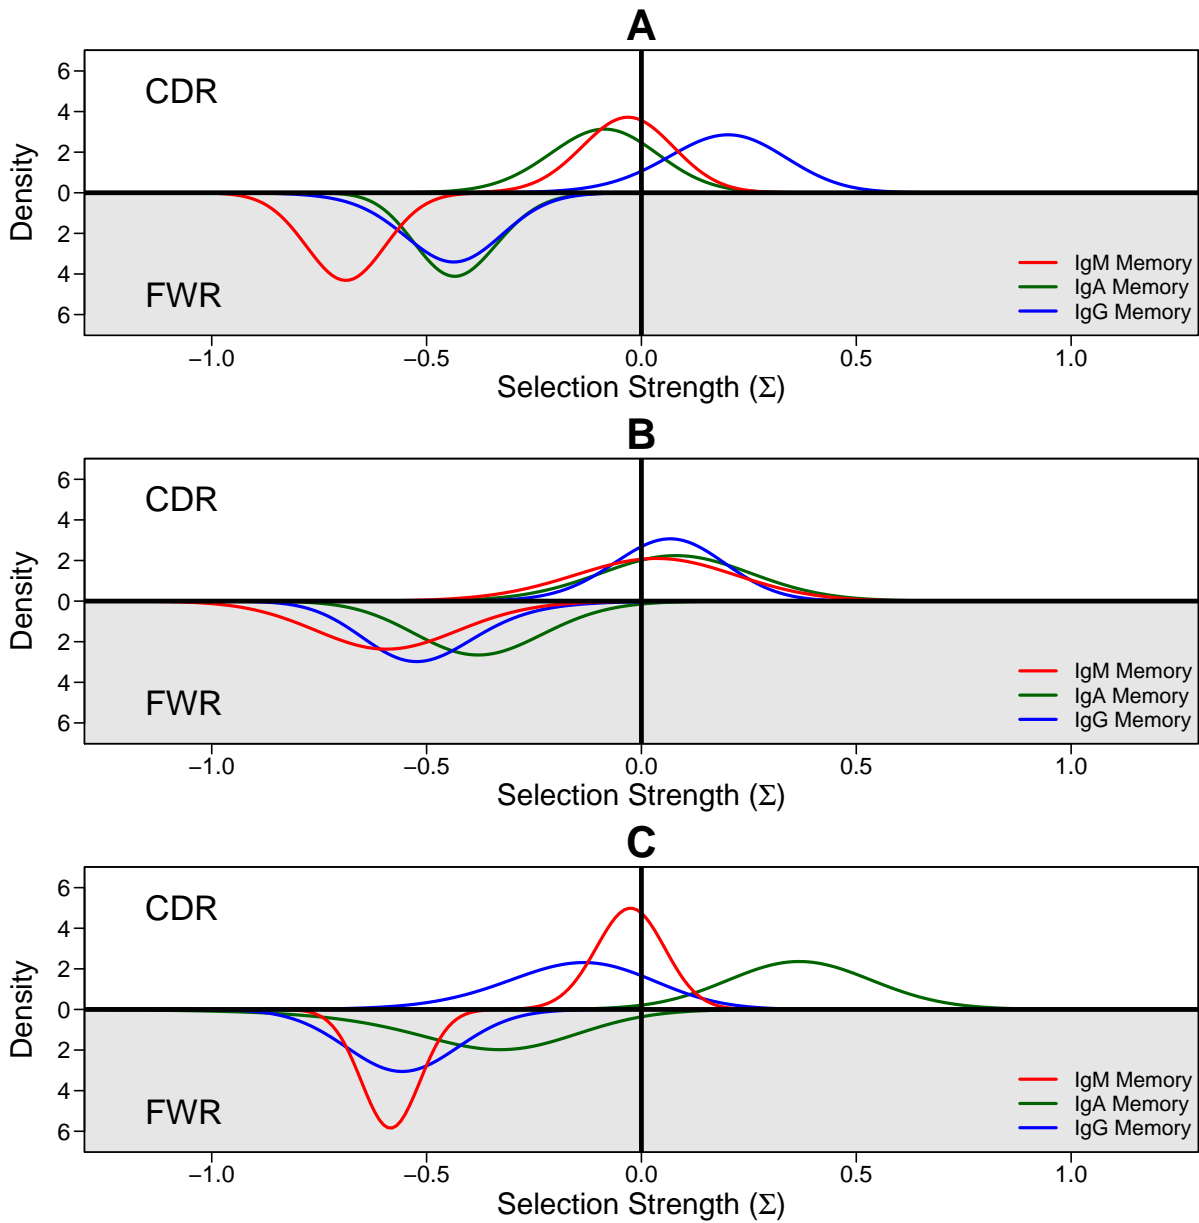

Figure S5: Selection analysis from figure 3c, carried out separately for the three individual subjects (A,B,C)

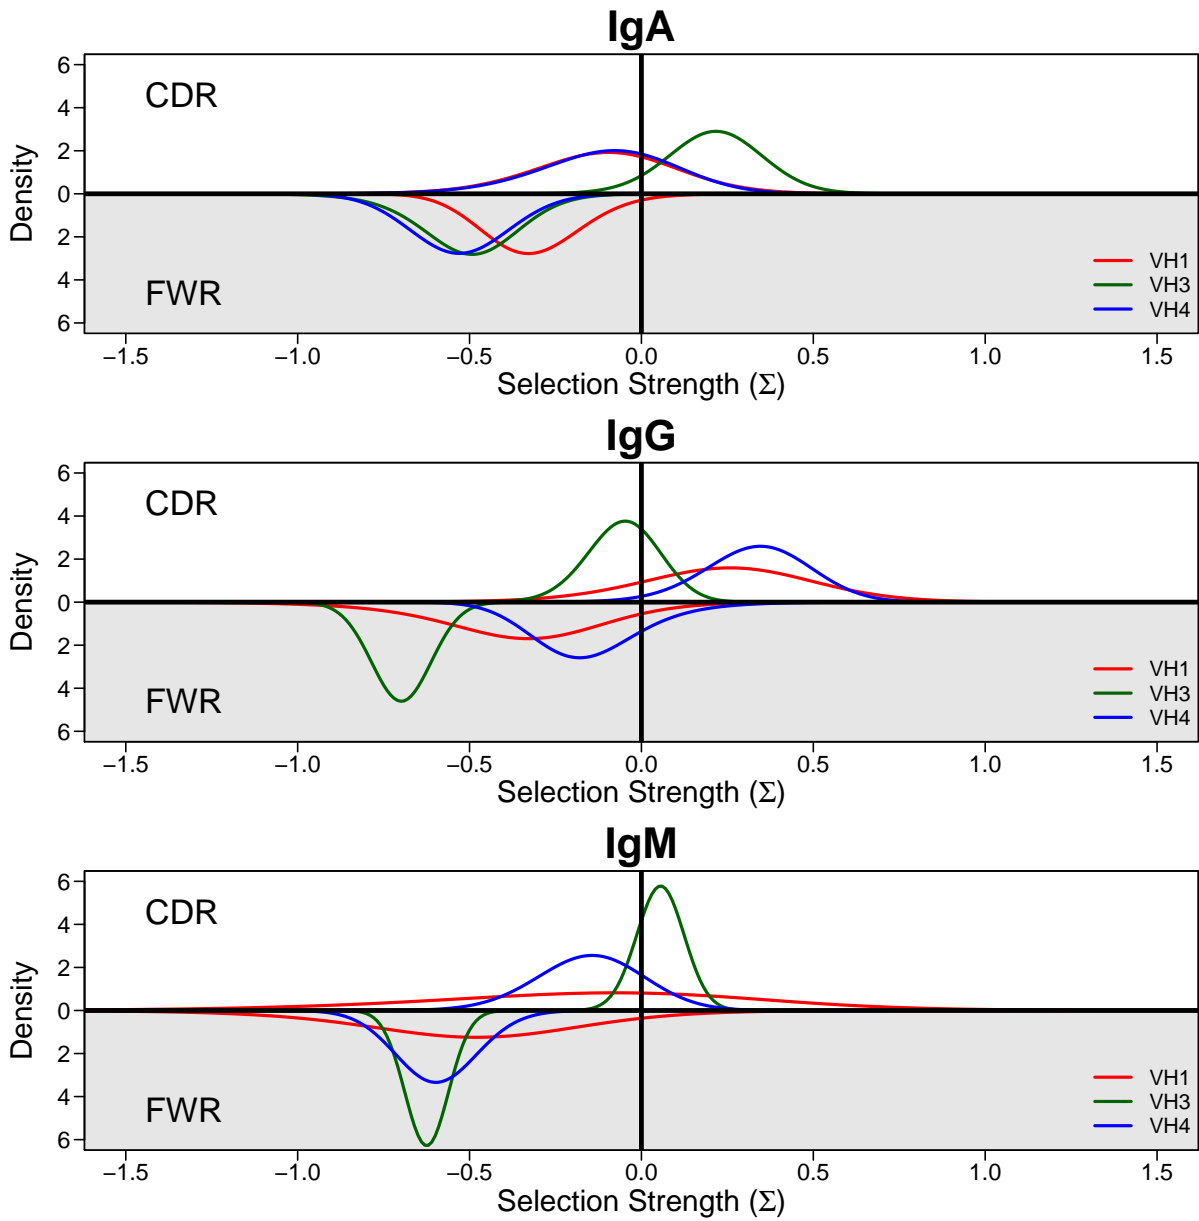

Figure S6: Selection analysis from figure 3c, carried out separately for the three cell isotype (IgA, IgG, IgM)

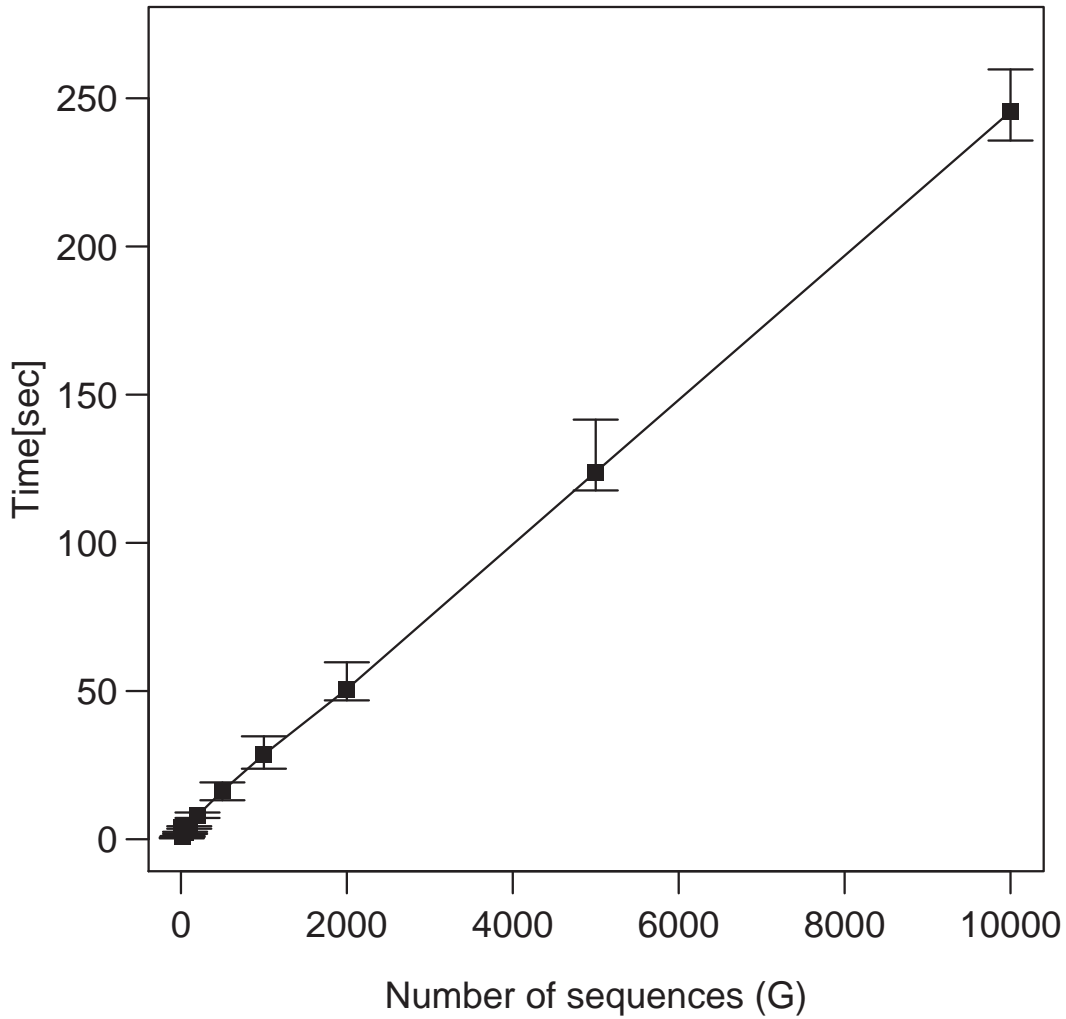

Figure S7: **Performance of the method on a single 1.73GHz processor** sequences were sampled from from high-throughput sequencing dataset with 46 different germline segments and an average of 23 mutations per sequence. Error bars represent 95% intervals of the 50 runs made for each value of G.
